# Supplementary material for: Spectroscopic and Computational Evidence of Intramolecular AuI⋅⋅⋅H+−N Hydrogen Bonding
Source: PubMed Central journal article supplement — Angew Chem Int Ed Engl. 2019 Jan 18;58(7):2011–6. doi: 10.1002/anie.201811982 (PMC6519277; doi:10.1002/anie.201811982), 2019-01-18
Supplement: ANIE-58-2011-s001.pdf [file ANIE-58-2011-s001.pdf]

Supporting Information

**Spectroscopic and Computational Evidence of Intramolecular  
 $\text{Au}^{\text{I}}\cdots\text{H}^{\text{+}}-\text{N}$  Hydrogen Bonding**

*Michal Straka,\* Erik Andris, Jan Vicha, Aleš Růžička, Jana Roithová,\* and Lubomír Rulíšek\**

anie\_201811982\_sm\_miscellaneous\_information.pdf

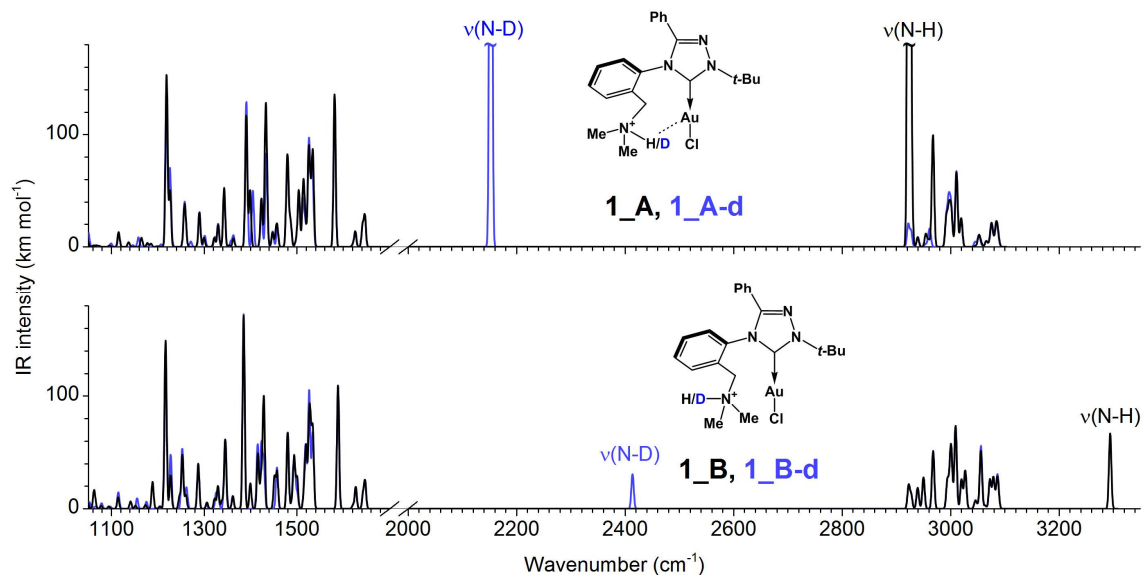

**Figure S1.** Harmonic vibrational spectra of **1\_A** and **1\_B** calculated at the B3LYP-D3/6-31G\*/Au:def-2SVP level of theory (see Methods). The frequencies below and above 2000 cm<sup>-1</sup> were scaled by factors of 0.99 and 0.955, respectively.

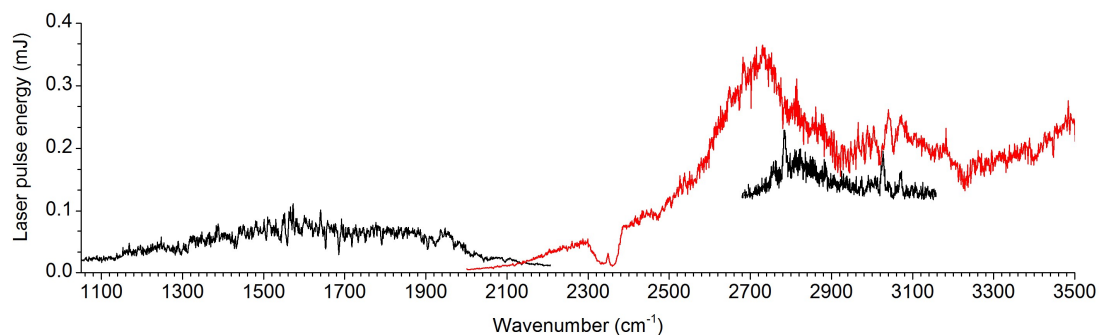

**Figure S2.** Power output of the IR laser system acquired behind the exit window of the ISORI instrument when acquiring the spectra of 1/1-D. Only a fraction of the laser power was recorded due to electrode geometry, to beam divergence and to absorption by the exit window (5 mm CaF<sub>2</sub>). The right trace (ca 3000 cm<sup>-1</sup>) was clipped because the minimum threshold of the power meter was set to 0.12 mJ. Therefore, we also show a typical energy profile recorded previously (red trace, not to scale).

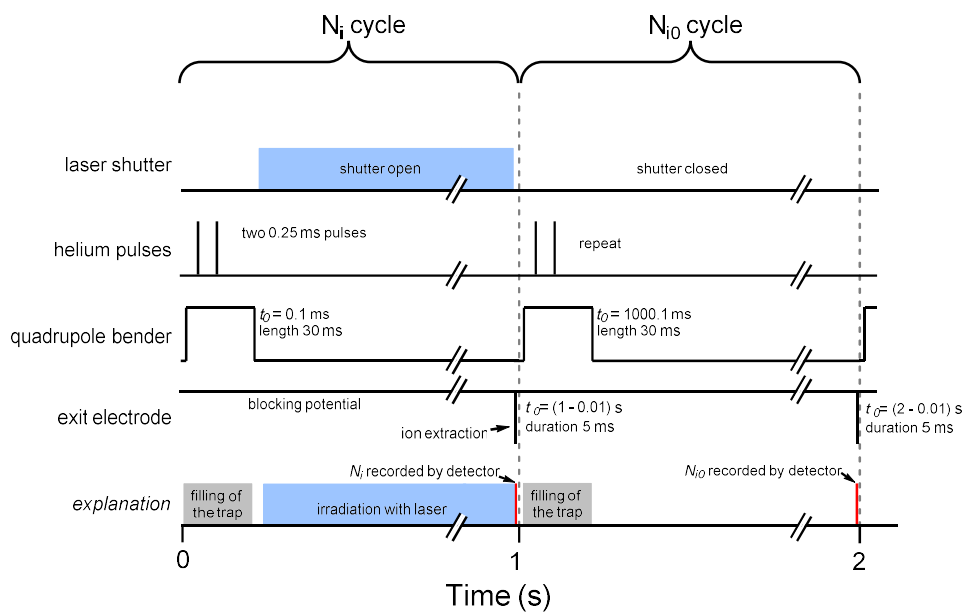

**Figure S3.** Timing sequence for the acquisition of IRPD and visPD spectra using the ISORI instrument

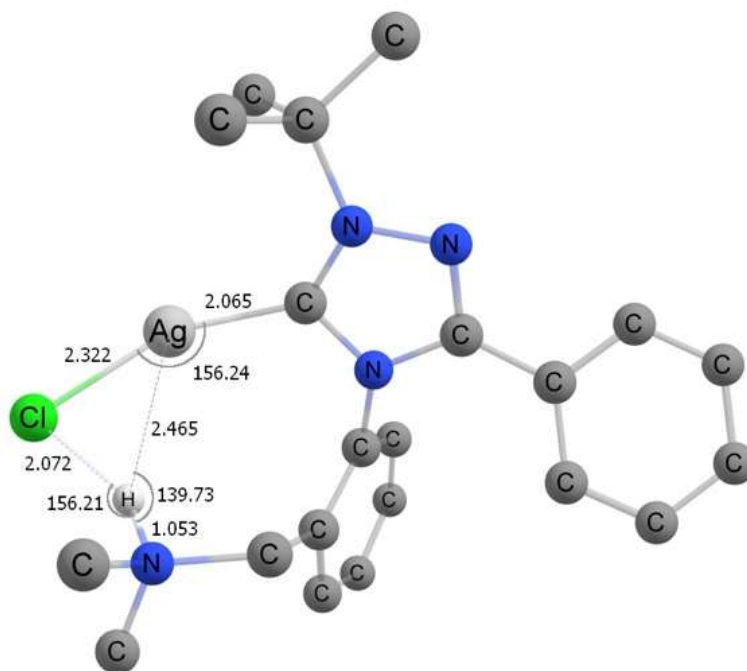

**Figure S4.** Silver analogue of system S1 calculated at PBE0-D3/def2-TZVPP level.

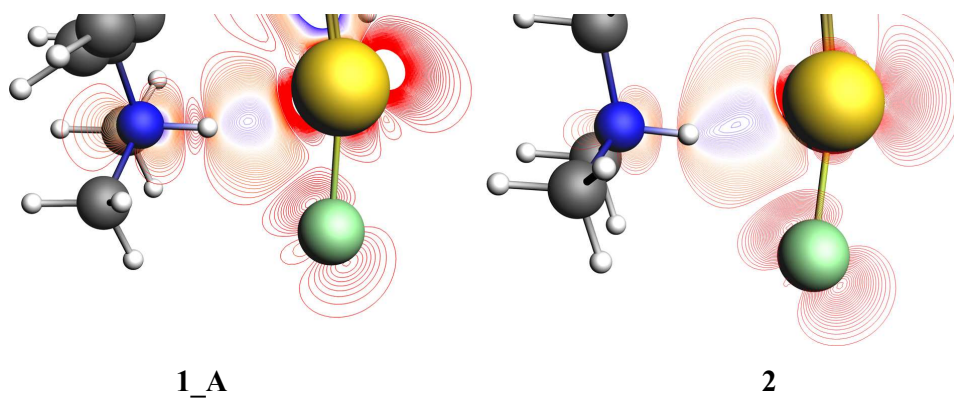

**Figure S5:** Differential ETS–NOCV electron densities of Au···H<sup>+</sup>–N interaction channels in 1\_A and 2. The blue/red color indicates increased/decreased electron density between corresponding atoms

**Table S1.** Selected structural parameters of **1\_A** calculated at different computational levels

| <b>System 1</b> |                      |       |       |       |       |        |       |        |
|-----------------|----------------------|-------|-------|-------|-------|--------|-------|--------|
| Level           | Basis set            | M–H   | N–H   | M–N   | M–H–N | C–M–Cl | H–Cl  | Cl–H–N |
| SCS-MP2         | def2-TZVPP           | 2.137 | 1.041 | 3.134 | 160   | 170    | 2.483 | 142    |
| PBE0-D3         | def2-TZVPP           | 2.165 | 1.045 | 3.163 | 159   | 169    | 2.494 | 142    |
| B3LYP           | def2-SVP             | 2.142 | 1.045 | 3.163 | 165   | 168    | 2.636 | 136    |
| B3LYP           | 6-31G*/ Au: def-2SVP | 2.168 | 1.045 | 3.189 | 165   | 169    | 2.636 | 137    |
| PBE0-D3         | 6-31G*/ Au: def2SVP  | 2.158 | 1.046 | 3.172 | 163   | 169    | 2.572 | 139    |
| PBE0-D3         | def2-TZVPP PCM       | 2.281 | 1.037 | 3.295 | 166   | 179    | 3.624 | 135    |
| PBE0            | def2-TZVPP           | 2.225 | 1.044 | 3.204 | 155   | 169    | 2.446 | 146    |

**Table S2.** Energy differences between geometry optimized **1\_A** and **1\_B** (Figure 1 in main text) at selected computational levels. All values are expressed as kcal/mol

| level                   | $E(\mathbf{1\_A}) - E(\mathbf{1\_B})$ |
|-------------------------|---------------------------------------|
| HF/def2-TZVPP           | -9.4                                  |
| SCS-MP2/def2-TZVPP      | -11.7                                 |
| PBE0-D3/def2-TZVPP      | -11.0                                 |
| PBE0-D3/def2-TZVPP(PCM) | -4.2                                  |

**Table S3.** Summary of the distances and QTAIM parameters at bond critical points (if found) of selected atoms pairs in **1\_A** and **1\_B**. Geometries at PBE0/def2-TZVPP level. All QTAIM parameters are calculated at the ZORA PBE0/TZP level

| <b>1_A</b>               |             |             |             |           |
|--------------------------|-------------|-------------|-------------|-----------|
| A···B                    | $r_{A···B}$ | $\rho$      | Laplacian   | DI        |
| Au···H(N)                | 2.17        | 0.033       | 0.076       | 0.13      |
| Au···H(tBu)              | 2.71/2.85   | 0.013/0.010 | 0.039/0.031 | 0.06/0.05 |
| Cl···H(N)                | 2.5         | No LCP      | No LCP      | 0.04      |
| <b>1_B</b>               |             |             |             |           |
| A···B                    | $r_{A···B}$ | $\rho$      | Laplacian   | DI        |
| Au...H(CH <sub>2</sub> ) | 2.54        | 0.019       | 0.051       | 0.08      |
| Au···H(t-Bu)             | 2.66/2.78   | 0.014/0.012 | 0.043/0.035 | 0.06/0.05 |
| Cl···H(MeN)              | 2.45/2.99   | 0.016/0.006 | 0.050/0.019 | 0.08      |

Coordinates of the calculated systems, all at PBE0-D3/def2-TZVPP level.

**System 1\_A**

54

AuC21N4H27Cl

|    |              |              |              |
|----|--------------|--------------|--------------|
| C  | -0.027430000 | 0.964709000  | -0.190745000 |
| N  | 1.047751000  | 0.124128000  | -0.152117000 |
| C  | 2.171208000  | 0.872660000  | 0.145937000  |
| N  | 1.821926000  | 2.114629000  | 0.308725000  |
| N  | 0.490073000  | 2.156236000  | 0.095489000  |
| C  | 3.547532000  | 0.398255000  | 0.251577000  |
| C  | 4.572690000  | 1.284312000  | -0.083262000 |
| C  | 5.894155000  | 0.890627000  | 0.026607000  |
| C  | 6.206879000  | -0.386287000 | 0.472277000  |
| C  | 5.191916000  | -1.268256000 | 0.813514000  |
| C  | 3.867062000  | -0.881306000 | 0.704401000  |
| C  | 1.049490000  | -1.236127000 | -0.595737000 |
| C  | 1.633149000  | -1.484450000 | -1.828259000 |
| C  | 1.765969000  | -2.780701000 | -2.293548000 |
| C  | 1.334632000  | -3.837780000 | -1.508662000 |
| C  | 0.748362000  | -3.585370000 | -0.280426000 |
| C  | 0.566529000  | -2.286828000 | 0.192816000  |
| Au | -1.900195000 | 0.341226000  | -0.431593000 |
| Cl | -3.938771000 | -0.663872000 | -0.398732000 |
| C  | -0.242571000 | 3.453218000  | 0.229221000  |
| C  | 0.774976000  | 4.566961000  | 0.419092000  |
| C  | -0.072802000 | -2.074987000 | 1.532985000  |
| N  | -1.576076000 | -2.129761000 | 1.517031000  |
| C  | -2.151515000 | -3.431066000 | 1.113095000  |
| C  | -1.153109000 | 3.360429000  | 1.448285000  |
| C  | -1.041495000 | 3.696438000  | -1.045157000 |
| C  | -2.138078000 | -1.670413000 | 2.806983000  |
| H  | 1.997474000  | -0.648866000 | -2.412216000 |
| H  | 7.241995000  | -0.693288000 | 0.555689000  |
| H  | 0.254613000  | -2.835098000 | 2.244151000  |
| H  | 0.183183000  | -1.095744000 | 1.935853000  |
| H  | 1.460454000  | -4.858217000 | -1.847021000 |
| H  | -3.221073000 | -1.630419000 | 2.712969000  |
| H  | -1.757941000 | -0.673891000 | 3.022714000  |
| H  | -1.847420000 | -2.364670000 | 3.593878000  |
| H  | 3.087833000  | -1.577709000 | 0.983943000  |
| H  | 4.321422000  | 2.278296000  | -0.430170000 |
| H  | 0.437647000  | -4.419843000 | 0.337415000  |
| H  | 5.432776000  | -2.261517000 | 1.171047000  |
| H  | 6.683565000  | 1.582214000  | -0.239416000 |
| H  | 2.222346000  | -2.962638000 | -3.257938000 |
| H  | 1.363932000  | 4.429944000  | 1.324299000  |
| H  | 0.229600000  | 5.507398000  | 0.498030000  |
| H  | 1.458095000  | 4.635311000  | -0.427022000 |
| H  | -1.803268000 | -3.683973000 | 0.116182000  |
| H  | -3.233310000 | -3.322674000 | 1.090404000  |
| H  | -1.854797000 | -4.193911000 | 1.831953000  |
| H  | -1.902403000 | 2.576298000  | 1.328224000  |
| H  | -1.676178000 | 4.307774000  | 1.580379000  |
| H  | -0.572033000 | 3.163696000  | 2.351042000  |
| H  | -0.387789000 | 3.712244000  | -1.918277000 |
| H  | -1.538352000 | 4.663962000  | -0.971842000 |
| H  | -1.811510000 | 2.939149000  | -1.198465000 |

|                   |              |              |              |
|-------------------|--------------|--------------|--------------|
| H                 | -1.895313000 | -1.437127000 | 0.803309000  |
| <b>System 1_B</b> |              |              |              |
| 54                |              |              |              |
| AuC21N4H27Cl      |              |              |              |
| C                 | -0.263911000 | -2.121630000 | -0.085034000 |
| C                 | 0.287790000  | -1.105600000 | -0.870904000 |
| C                 | 0.993777000  | -1.416106000 | -2.025306000 |
| C                 | 1.197904000  | -2.731748000 | -2.397500000 |
| C                 | 0.715090000  | -3.751573000 | -1.593361000 |
| C                 | -0.005931000 | -3.439857000 | -0.453972000 |
| N                 | 0.285428000  | 0.270804000  | -0.481327000 |
| C                 | -0.769175000 | 1.142377000  | -0.514777000 |
| N                 | -0.199463000 | 2.329712000  | -0.307940000 |
| N                 | 1.136700000  | 2.254760000  | -0.134945000 |
| C                 | 1.439857000  | 0.998213000  | -0.245502000 |
| Au                | -2.699458000 | 0.667573000  | -0.579558000 |
| Cl                | -4.878974000 | 0.052269000  | -0.405424000 |
| C                 | 2.802211000  | 0.483413000  | -0.134820000 |
| C                 | 3.848076000  | 1.285271000  | -0.592141000 |
| C                 | 5.157203000  | 0.852319000  | -0.475189000 |
| C                 | 5.435556000  | -0.379583000 | 0.100261000  |
| C                 | 4.399284000  | -1.176768000 | 0.565132000  |
| C                 | 3.087536000  | -0.750161000 | 0.449058000  |
| C                 | -0.874038000 | 3.663207000  | -0.212160000 |
| C                 | -1.726013000 | 3.874283000  | -1.457526000 |
| C                 | -1.086899000 | -1.816505000 | 1.129427000  |
| N                 | -2.299478000 | -2.701466000 | 1.297255000  |
| C                 | -3.172008000 | -2.142962000 | 2.369485000  |
| C                 | 0.196924000  | 4.740916000  | -0.138783000 |
| C                 | -1.720124000 | 3.681919000  | 1.055533000  |
| C                 | -3.111206000 | -2.948688000 | 0.067083000  |
| H                 | 1.403755000  | -0.608048000 | -2.617528000 |
| H                 | 6.460601000  | -0.717152000 | 0.189825000  |
| H                 | -0.511916000 | -1.935141000 | 2.051639000  |
| H                 | -1.469638000 | -0.797415000 | 1.091289000  |
| H                 | 0.894071000  | -4.787050000 | -1.852761000 |
| H                 | -3.954584000 | -2.863618000 | 2.596341000  |
| H                 | -3.618498000 | -1.224504000 | 1.988118000  |
| H                 | -2.571923000 | -1.946631000 | 3.255767000  |
| H                 | 2.289438000  | -1.376958000 | 0.825600000  |
| H                 | 3.623014000  | 2.245851000  | -1.037480000 |
| H                 | -0.377487000 | -4.256267000 | 0.157522000  |
| H                 | 4.614353000  | -2.132946000 | 1.025550000  |
| H                 | 5.963412000  | 1.478436000  | -0.836128000 |
| H                 | 1.749394000  | -2.957590000 | -3.300784000 |
| H                 | 0.823337000  | 4.633899000  | 0.744927000  |
| H                 | -0.306424000 | 5.706678000  | -0.093302000 |
| H                 | 0.839887000  | 4.729628000  | -1.018525000 |
| H                 | -3.579692000 | -2.013548000 | -0.237189000 |
| H                 | -3.879614000 | -3.675024000 | 0.325382000  |
| H                 | -2.475063000 | -3.337225000 | -0.720606000 |
| H                 | -2.510030000 | 2.930128000  | 1.021620000  |
| H                 | -2.190761000 | 4.659978000  | 1.158318000  |
| H                 | -1.100387000 | 3.507287000  | 1.936737000  |
| H                 | -1.116746000 | 3.815607000  | -2.360606000 |
| H                 | -2.176033000 | 4.866169000  | -1.411983000 |
| H                 | -2.533883000 | 3.145707000  | -1.532603000 |
| H                 | -1.961681000 | -3.607047000 | 1.617585000  |

## Ag analogue of 1\_A

54

AgC21N4H27Cl

|    |              |              |              |
|----|--------------|--------------|--------------|
| C  | -0.012781000 | 1.029432000  | -0.286779000 |
| N  | 1.047281000  | 0.175014000  | -0.228338000 |
| C  | 2.173623000  | 0.892430000  | 0.132061000  |
| N  | 1.837974000  | 2.136119000  | 0.316026000  |
| N  | 0.515176000  | 2.199528000  | 0.051466000  |
| C  | 3.538278000  | 0.393260000  | 0.273614000  |
| C  | 4.587877000  | 1.278368000  | 0.021103000  |
| C  | 5.898737000  | 0.861747000  | 0.166505000  |
| C  | 6.177549000  | -0.438135000 | 0.566039000  |
| C  | 5.138554000  | -1.319875000 | 0.824944000  |
| C  | 3.823971000  | -0.909729000 | 0.680011000  |
| C  | 1.023685000  | -1.181237000 | -0.682525000 |
| C  | 1.619958000  | -1.435601000 | -1.908062000 |
| C  | 1.726464000  | -2.731086000 | -2.380975000 |
| C  | 1.262357000  | -3.781153000 | -1.605511000 |
| C  | 0.667549000  | -3.523163000 | -0.382602000 |
| C  | 0.499694000  | -2.223244000 | 0.093147000  |
| Ag | -1.934498000 | 0.345439000  | -0.605609000 |
| Cl | -3.754566000 | -1.073921000 | -0.352054000 |
| C  | -0.214133000 | 3.492380000  | 0.206940000  |
| C  | 0.800818000  | 4.606090000  | 0.409685000  |
| C  | -0.125163000 | -1.984271000 | 1.437693000  |
| N  | -1.610608000 | -2.207338000 | 1.522112000  |
| C  | -2.032741000 | -3.620099000 | 1.393874000  |
| C  | -1.121480000 | 3.374881000  | 1.426492000  |
| C  | -1.021785000 | 3.752781000  | -1.058113000 |
| C  | -2.144197000 | -1.611449000 | 2.768778000  |
| H  | 2.015015000  | -0.604916000 | -2.478963000 |
| H  | 7.204524000  | -0.763156000 | 0.677248000  |
| H  | 0.317998000  | -2.640000000 | 2.190476000  |
| H  | 0.039303000  | -0.955151000 | 1.751279000  |
| H  | 1.373014000  | -4.802929000 | -1.945212000 |
| H  | -3.226125000 | -1.720965000 | 2.765469000  |
| H  | -1.892315000 | -0.552993000 | 2.789002000  |
| H  | -1.710020000 | -2.120235000 | 3.628292000  |
| H  | 3.026283000  | -1.607925000 | 0.894922000  |
| H  | 4.363434000  | 2.290271000  | -0.290477000 |
| H  | 0.350982000  | -4.358071000 | 0.229721000  |
| H  | 5.352080000  | -2.331843000 | 1.145562000  |
| H  | 6.706701000  | 1.553523000  | -0.035757000 |
| H  | 2.191165000  | -2.919039000 | -3.340209000 |
| H  | 1.390332000  | 4.458294000  | 1.312690000  |
| H  | 0.256557000  | 5.546266000  | 0.499119000  |
| H  | 1.483933000  | 4.682831000  | -0.435954000 |
| H  | -1.769232000 | -3.984953000 | 0.406116000  |
| H  | -3.114523000 | -3.655626000 | 1.499276000  |
| H  | -1.554265000 | -4.215577000 | 2.170536000  |
| H  | -1.864429000 | 2.586062000  | 1.292955000  |
| H  | -1.652517000 | 4.314871000  | 1.578245000  |
| H  | -0.537792000 | 3.164344000  | 2.324373000  |
| H  | -0.374809000 | 3.781984000  | -1.935772000 |
| H  | -1.522070000 | 4.717124000  | -0.968171000 |
| H  | -1.790147000 | 2.994918000  | -1.217694000 |
| H  | -2.114867000 | -1.710951000 | 0.741912000  |



## Model 2

19

AuC4NH12Cl

|    |              |              |              |
|----|--------------|--------------|--------------|
| C  | -0.027430000 | 0.964709000  | -0.190745000 |
| H  | 0.828041000  | 0.549462000  | -0.728343000 |
| H  | 0.272697000  | 1.703397000  | 0.556204000  |
| H  | 0.321810000  | -2.251182000 | 0.536722000  |
| Au | -1.900195000 | 0.341226000  | -0.431593000 |
| Cl | -3.938771000 | -0.663872000 | -0.398732000 |
| C  | -0.072778000 | -2.074997000 | 1.532938000  |
| N  | -1.576076000 | -2.129765000 | 1.517040000  |
| C  | -2.151515000 | -3.431065000 | 1.113092000  |
| C  | -2.138078000 | -1.670420000 | 2.806986000  |
| H  | 0.254593000  | -2.835083000 | 2.244176000  |
| H  | 0.183179000  | -1.095746000 | 1.935859000  |
| H  | -3.221073000 | -1.630419000 | 2.712969000  |
| H  | -1.757941000 | -0.673891000 | 3.022714000  |
| H  | -1.847420000 | -2.364670000 | 3.593878000  |
| H  | -1.803268000 | -3.683973000 | 0.116182000  |
| H  | -3.233310000 | -3.322674000 | 1.090404000  |
| H  | -1.854797000 | -4.193911000 | 1.831953000  |
| H  | -1.895313000 | -1.437120000 | 0.803316000  |

## CN2 analogue of Model2

19

|    |           |           |           |
|----|-----------|-----------|-----------|
| C  | -0.027430 | 0.964709  | -0.190745 |
| N  | 1.181378  | 0.895002  | 0.417540  |
| N  | 1.017608  | 1.777616  | -0.495117 |
| Au | -1.900195 | 0.341226  | -0.431593 |
| Cl | -3.938771 | -0.663872 | -0.398732 |
| H  | 0.322460  | -2.250674 | 0.536954  |
| C  | -0.072802 | -2.074987 | 1.532985  |
| N  | -1.576076 | -2.129761 | 1.517031  |
| C  | -2.151515 | -3.431066 | 1.113095  |
| C  | -2.138078 | -1.670413 | 2.806983  |
| H  | 0.254613  | -2.835098 | 2.244151  |
| H  | 0.183183  | -1.095744 | 1.935853  |
| H  | -3.221073 | -1.630419 | 2.712969  |
| H  | -1.757941 | -0.673891 | 3.022714  |
| H  | -1.847420 | -2.364670 | 3.593878  |
| H  | -1.803268 | -3.683973 | 0.116182  |
| H  | -3.233310 | -3.322674 | 1.090404  |
| H  | -1.854797 | -4.193911 | 1.831953  |
| H  | -1.895313 | -1.437127 | 0.803309  |

## Model 3

46

AuC15N4H25Cl

|   |              |              |             |
|---|--------------|--------------|-------------|
| H | -3.221073000 | -1.630419000 | 2.712969000 |
| H | -1.757941000 | -0.673891000 | 3.022714000 |
| H | -1.847420000 | -2.364670000 | 3.593878000 |
| C | -2.138077000 | -1.670437000 | 2.806992000 |

|    |              |              |              |
|----|--------------|--------------|--------------|
| N  | -1.576076000 | -2.129771000 | 1.517043000  |
| H  | -1.895314000 | -1.437111000 | 0.803325000  |
| C  | -2.151515000 | -3.431063000 | 1.113084000  |
| H  | -3.233310000 | -3.322674000 | 1.090404000  |
| H  | -1.854797000 | -4.193911000 | 1.831953000  |
| H  | -1.803268000 | -3.683973000 | 0.116182000  |
| C  | -0.072804000 | -2.074873000 | 1.532909000  |
| H  | 0.183208000  | -1.095744000 | 1.935838000  |
| H  | 0.307701000  | -2.286227000 | 0.542051000  |
| H  | 0.254594000  | -2.835117000 | 2.244140000  |
| N  | 1.047785000  | 0.124003000  | -0.152000000 |
| C  | -0.027445000 | 0.964692000  | -0.190718000 |
| N  | 0.490072000  | 2.156235000  | 0.095493000  |
| N  | 1.821934000  | 2.114638000  | 0.308674000  |
| C  | 2.171179000  | 0.872716000  | 0.145903000  |
| Au | -1.900194000 | 0.341227000  | -0.431599000 |
| Cl | -3.938771000 | -0.663872000 | -0.398733000 |
| C  | 3.547529000  | 0.398251000  | 0.251598000  |
| C  | 4.572690000  | 1.284312000  | -0.083261000 |
| C  | 5.894155000  | 0.890627000  | 0.026608000  |
| C  | 6.206879000  | -0.386287000 | 0.472278000  |
| C  | 5.191916000  | -1.268256000 | 0.813514000  |
| C  | 3.867062000  | -0.881306000 | 0.704401000  |
| C  | -0.242571000 | 3.453218000  | 0.229222000  |
| C  | -1.041495000 | 3.696438000  | -1.045156000 |
| C  | 0.774976000  | 4.566961000  | 0.419093000  |
| C  | -1.153109000 | 3.360429000  | 1.448286000  |
| H  | 7.241995000  | -0.693288000 | 0.555690000  |
| H  | 3.087833000  | -1.577709000 | 0.983943000  |
| H  | 4.321422000  | 2.278296000  | -0.430169000 |
| H  | 5.432776000  | -2.261517000 | 1.171047000  |
| H  | 6.683565000  | 1.582214000  | -0.239415000 |
| H  | 1.363932000  | 4.429944000  | 1.324300000  |
| H  | 0.229600000  | 5.507398000  | 0.498031000  |
| H  | 1.458095000  | 4.635311000  | -0.427021000 |
| H  | -1.902403000 | 2.576298000  | 1.328224000  |
| H  | -1.676178000 | 4.307774000  | 1.580380000  |
| H  | -0.572033000 | 3.163696000  | 2.351043000  |
| H  | -0.387789000 | 3.712244000  | -1.918276000 |
| H  | -1.538352000 | 4.663962000  | -0.971841000 |
| H  | -1.811510000 | 2.939149000  | -1.198464000 |
| H  | 1.053572000  | -0.805625000 | -0.526180000 |
